# Supplementary material for: Detection of the Nav channel kdr-like mutation and modeling of factors affecting survivorship of Culex quinquefasciatus mosquitoes from six areas of Harris County (Houston), Texas, after permethrin field-cage tests
Source: PubMed Central journal article supplement (PMC7714350; doi:10.1371/journal.pntd.0008860), 2020-11-19
Supplement: pntd.0008860.s004.pdf [file pntd.0008860.s004.pdf]

**S1 Table. Predicted survival probability of homozygous and heterozygous resistant *Cx. quinquefasciatus* collected from the 6 operational areas generated by logistic regression analysis and used to construct Fig. 11.**

|           | Area  |       |       |       |       |       |       |       |       |       |       |       |
|-----------|-------|-------|-------|-------|-------|-------|-------|-------|-------|-------|-------|-------|
|           | 55    |       | 423   |       | 225   |       | 708   |       | 205   |       | 109   |       |
| Genotype  | RR    | RS    | RR    | RS    | RR    | RS    | RR    | RS    | RR    | RS    | RR    | RS    |
| P-PrS     | 0.055 | 0.042 | 0.197 | 0.154 | 0.191 | 0.150 | 0.241 | 0.192 | 0.285 | 0.229 | 0.298 | 0.240 |
| Lower CI  | 0.030 | 0.020 | 0.145 | 0.096 | 0.132 | 0.090 | 0.190 | 0.126 | 0.216 | 0.157 | 0.218 | 0.155 |
| Higher CI | 0.100 | 0.083 | 0.261 | 0.239 | 0.268 | 0.238 | 0.302 | 0.281 | 0.366 | 0.321 | 0.392 | 0.352 |

P-PrS, predicted probability of survival. CI, confidential interval.
